# Supplementary material for: Initial shifts in nitrogen impact on ecosystem carbon fluxes in an alpine meadow: patterns and causes
Source: Copernicus journal article supplement (doi:10.5194/bg-14-3947-2017), 2017-09-13
Supplement: Supplementary file 1 [file bg-14-3947-2017-supplement.pdf]

Supplement of Biogeosciences, 14, 3947–3956, 2017  
<https://doi.org/10.5194/bg-14-3947-2017-supplement>  
© Author(s) 2017. This work is distributed under  
the Creative Commons Attribution 3.0 License.

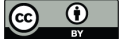

*Supplement of*

## **Initial shifts in nitrogen impact on ecosystem carbon fluxes in an alpine meadow: patterns and causes**

**Bing Song et al.**

*Correspondence to:* Shuli Niu ([sniu@igsnr.ac.cn](mailto:sniu@igsnr.ac.cn))

The copyright of individual parts of the supplement might differ from the CC BY 3.0 License.

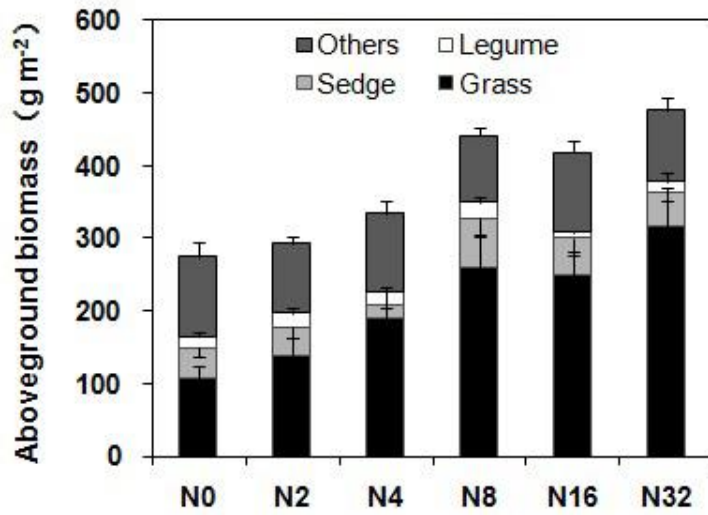

**Figure S1.** Plant aboveground biomass in response to the N addition gradient in 2014. N0, N2, N4, N8, N16, N32 represent N addition rate is 0, 2, 4, 8, 16, 32 gN m<sup>-2</sup> year<sup>-1</sup>, respectively.

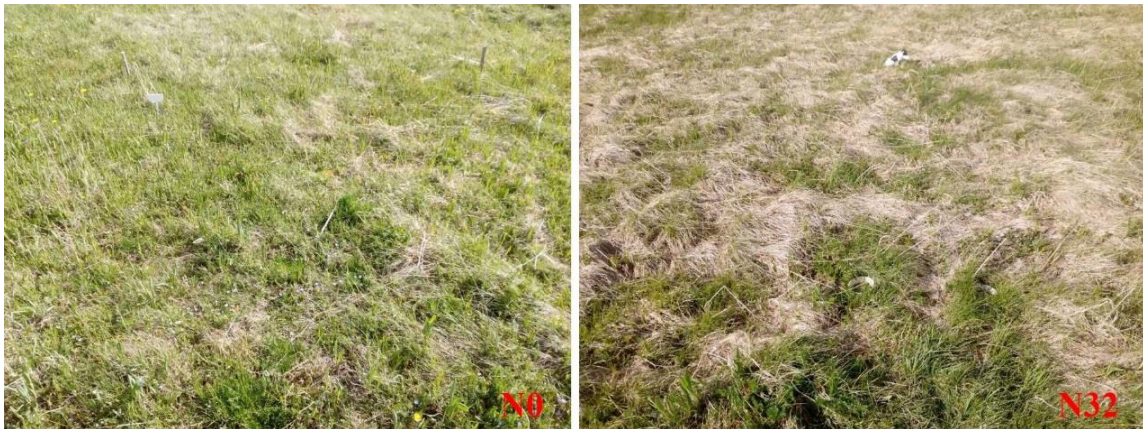

**Figure S2.** N-induced accumulation of standing litter in high N addition plots (photos were taken on June 13).
